# Supplementary material
Source: MDPI journal article supplement (https://www.mdpi.com/2071-1050/5/3/1317)
Supplement: s1 [file s1]

## Supplementary Information

### Appendix A: Details on Statistical Analyses

#### *Post hoc analyses*

##### *Survivorship by treatment*

We conducted these analyses with a GLMM, using binomial error structure (these tests are in addition to the within-light-level tests reported in the main text).

**Table A-1.** *Post hoc* analyses of differences in survivorship by treatment.

| Comparison                                                          | Statistics                    | Result                                                                  |
|---------------------------------------------------------------------|-------------------------------|-------------------------------------------------------------------------|
| Both open treatments<br>vs.<br>the other four treatments            | $z = 5.277$ ;<br>$p < 0.001$  | Open treatments differ from<br>Tree and Canopy                          |
| Tree-Fern treatment<br>vs.<br>Canopy treatments (CF and CN grouped) | $z = 0.115$ ;<br>$p = 0.908$  | Tree-Fern treatments do not differ from<br>canopy treatments            |
| Both open treatments<br>vs.<br>Tree-No Fern treatment               | $z = 2.337$ ;<br>$p = 0.0194$ | Open treatments (grouped) differ from<br>Tree-No Fern treatment         |
| Tree-No Fern treatment<br>Vs.<br>Canopy-No Fern treatment           | $z = -1.433$ ;<br>$p = 0.152$ | Tree-No Fern treatment does not differ<br>from Canopy-No Fern treatment |

##### *Relative Height by Species*

We conducted these analyses with a GLMM, using Gaussian error structure. Plot and Treatment were specified as random effects. Since the `lmer` function does not provide  $p$ -values when Gaussian error structure is used, we found approximate  $p$ -values using the `pvals.fnc` function in the `languageR` library.

**Table A-2.** *Post hoc* analyses of species-specific differences in relative height. Most differences were significant and are listed in italics; those that were not are in bold and non-italics, as these indicate the “pairings” of relative gains in height.

|        | hoawa                          | kolea                         | mamaki                         | maile                         | naio                          | pilo |
|--------|--------------------------------|-------------------------------|--------------------------------|-------------------------------|-------------------------------|------|
| kolea  | $t = -4.929$ ,<br>$p < 0.0001$ | ---                           | ---                            | ---                           | ---                           | ---  |
| mamaki | $t = -0.07$ ,<br>$p = 0.944$   | $t = 4.268$ ,<br>$p < 0.0001$ | ---                            | ---                           | ---                           | ---  |
| maile  | $t = -6.056$ ,<br>$p < 0.0001$ | $t = -1.67$ ,<br>$p = 0.097$  | $t = -5.686$ ,<br>$p < 0.0001$ | ---                           | ---                           | ---  |
| naio   | $t = 3.14$ ,<br>$p = 0.002$    | $t = 8.477$ ,<br>$p < 0.0001$ | $t = 3.163$ ,<br>$p = 0.002$   | $t = 9.705$ ,<br>$p < 0.0001$ | ---                           | ---  |
| pilo   | $t = 2.316$ ,<br>$p = 0.0218$  | $t = 6.46$ ,<br>$p < 0.0001$  | $t = 2.461$ ,<br>$p = 0.015$   | $t = 7.759$ ,<br>$p < 0.0001$ | $t = -0.271$ ,<br>$p = 0.787$ | ---  |

**Appendix B:** Calculations of cost per surviving seedling.

**Table B-1.** Details on cost calculations per surviving seedling. Excel files are available by request from the first author.

| SEEDLINGS                                                    |                  |                      |           |                    | SEEDS                                                     |                           |                             |                              |                            |                      |                          |
|--------------------------------------------------------------|------------------|----------------------|-----------|--------------------|-----------------------------------------------------------|---------------------------|-----------------------------|------------------------------|----------------------------|----------------------|--------------------------|
| FIXED COSTS SEEDLINGS                                        | ALL light levels | TREE and CANOPY only | OPEN only | OPEN and TREE only | FIXED COSTS SEEDS                                         | ALL spp. and light levels | ALL light levels, no mamaki | TREE and CANOPY, all species | TREE and CANOPY, no mamaki | OPEN only, no mamaki | OPEN and TREE, no mamaki |
| Number of planting sites                                     | 720              | 480                  | 240       | 480                | Number of planting sites                                  | 720                       | 600                         | 480                          | 400                        | 200                  | 400                      |
| Number of seedlings planted                                  | 720              | 480                  | 240       | 480                | Number of seeds planted                                   | 3,960                     | 3,240                       | 2,640                        | 2,160                      | 1,080                | 2,160                    |
| Number of survivors                                          | 541              | 387                  | 154       | 342                | Number of sprouted seeds                                  | 90                        | 90                          | 62                           | 62                         | 28                   | 59                       |
| Survival rate                                                | 0.75             | 0.81                 | 0.64      | 0.71               | Percent germination                                       | 0.023                     | 0.028                       | 0.023                        | 0.029                      | 0.026                | 0.027                    |
| Cost per plant materials and site prep                       | \$ 5.18          | \$ 5.18              | \$ 5.18   | \$ 5.18            | Cost for collection and cleaning                          | \$ 400.00                 | \$ 333.33                   | \$ 266.67                    | \$ 222.22                  | \$ 111.11            | \$ 222.22                |
| Total cost for seedlings (collection, raising) and site prep | \$ 3,730         | \$ 2,486             | \$ 1,243  | \$ 2,486           | Cost for metal grates to cover seeds                      | \$ 216.00                 | \$ 180.00                   | \$ 144.00                    | \$ 120.00                  | \$ 60.00             | \$ 120.00                |
|                                                              |                  |                      |           |                    |                                                           | \$                        | \$                          |                              |                            | \$                   | \$                       |
|                                                              |                  |                      |           |                    | Cost for site prep per site                               | 0.26                      | 0.26                        | \$ 0.26                      | \$ 0.26                    | 0.26                 | 0.26                     |
|                                                              |                  |                      |           |                    |                                                           | \$                        | \$                          |                              |                            | \$                   | \$                       |
|                                                              |                  |                      |           |                    | Site Prep Cost total                                      | 187.20                    | 156.00                      | \$ 124.80                    | \$ 104.00                  | 52.00                | 104.00                   |
|                                                              |                  |                      |           |                    | Total cost for seeds (collection, cleaning) and site prep | \$803.20                  | \$ 669.33                   | \$ 535.47                    | \$ 446.22                  | \$ 223.11            | \$ 446.22                |

**Table B-1. Cont.**

| VARIABLE COSTS/ SCENARIOS                                       |          |          |          |          | VARIABLE COSTS/ SCENARIOS                                                     |          |          |          |          |          |          |
|-----------------------------------------------------------------|----------|----------|----------|----------|-------------------------------------------------------------------------------|----------|----------|----------|----------|----------|----------|
| PAID LABOR                                                      |          |          |          |          | PAID LABOR                                                                    |          |          |          |          |          |          |
| Time to plant each site                                         | 0.50     | 0.50     | 0.50     | 0.50     | Time to plant each site                                                       | 0.17     | 0.17     | 0.17     | 0.17     | 0.17     | 0.17     |
| Hours to plant seedlings (including grass clearing, mattoxing)) | 360      | 240      | 120      | 240      | Number of hours required to plant seeds (including grass clearing, mattoxing) | 122      | 102      | 82       | 68       | 34       | 68       |
| Cost per employee hour                                          | \$ 10    | \$ 10    | \$ 10    | \$ 10    | Cost per employee hour                                                        | \$ 10    | \$ 10    | \$ 10    | \$ 10    | \$ 10    | \$ 10    |
| Total cost for labor                                            | \$ 3,600 | \$ 2,400 | \$ 1,200 | \$ 2,400 | Total cost for labor                                                          | \$ 1,224 | \$ 1,020 | \$ 816   | \$ 680   | \$ 340   | \$ 680   |
| Total cost (materials + labor)                                  | \$ 7,330 | \$ 4,886 | \$ 2,443 | \$ 4,886 | Total cost seeds (materials + labor)                                          | \$ 2,027 | \$ 1,689 | \$ 1,351 | \$ 1,126 | \$ 563   | \$ 1,126 |
| Amount per surviving seedling                                   | \$ 13.55 | \$ 12.63 | \$ 15.86 | \$ 14.29 | Cost per sprouted seed                                                        | \$ 22.52 | \$ 18.77 | \$ 21.80 | \$ 18.16 | \$ 20.11 | \$ 19.09 |
| Amount per planted seedling                                     | \$ 10.18 | \$ 10.18 | \$ 10.18 | \$ 10.18 | Cost per planted seed                                                         | \$ 0.51  | \$ 0.52  | \$ 0.51  | \$ 0.52  | \$ 0.52  | \$ 0.52  |
| VOLUNTEER LABOR                                                 |          |          |          |          | VOLUNTEER LABOR (20 volunteers)                                               |          |          |          |          |          |          |
| Number of volunteers                                            | 20       | 20       | 20       | 20       | Number of volunteers                                                          | 20       | 20       | 20       | 20       | 20       | 20       |
| Hours worked per volunteer                                      | 18       | 12       | 6        | 12       | Hours worked per volunteer                                                    | 6.12     | 5.1      | 4.08     | 3.4      | 1.7      | 3.4      |
| Number of staff hours required                                  | 27       | 18       | 9        | 18       | Number of staff hours required                                                | 9.18     | 7.65     | 6.12     | 5.1      | 2.55     | 5.1      |
| Cost per coordinator hour                                       | 25       | 25       | 25       | 25       | Cost per coordinator hour                                                     | 25       | 25       | 25       | 25       | 25       | 25       |

**Table B-1. Cont.**

| VARIABLE COSTS/<br>SCENARIOS         |                |                |                |                | VARIABLE COSTS/<br>SCENARIOS   |                 |                |                 |                |                 |                |
|--------------------------------------|----------------|----------------|----------------|----------------|--------------------------------|-----------------|----------------|-----------------|----------------|-----------------|----------------|
| PAID LABOR                           |                |                |                |                | PAID LABOR                     |                 |                |                 |                |                 |                |
| Total cost for labor                 | \$ 675         | \$ 450         | \$ 225         | \$ 450         | Total cost for labor           | \$ 230          | \$ 191         | \$ 153          | \$ 128         | \$ 64           | \$ 128         |
| Total cost (materials + labor)       | \$ 4,405       | \$ 2,936       | \$ 1,468       | \$ 2,936       | Total cost (materials + labor) | \$ 1,033        | \$ 861         | \$ 688          | \$ 574         | \$ 287          | \$ 574         |
| <b>Amount per surviving seedling</b> | <b>\$ 8.14</b> | <b>\$ 7.59</b> | <b>\$ 9.53</b> | <b>\$ 8.59</b> | <b>Cost per sprouted seed</b>  | <b>\$ 11.47</b> | <b>\$ 9.56</b> | <b>\$ 11.10</b> | <b>\$ 9.25</b> | <b>\$ 10.25</b> | <b>\$ 9.72</b> |
| Amount per planted seedling          | \$ 6.12        | \$ 4.08        | \$ 2.04        | \$ 4.08        | Cost per planted seed          | \$ 0.26         | \$ 0.27        | \$ 0.26         | \$ 0.27        | \$ 0.27         | \$ 0.27        |
